# Viral Taxonomy

Marjorie J. Miller

*From the Department of Pathology and Laboratory Medicine,  
UCLA Medical Center, Los Angeles, California*

| Family             | Subfamily          | Genus                            | Representative species pathogenic for humans<br>(no. of members)                                                                                             |
|--------------------|--------------------|----------------------------------|--------------------------------------------------------------------------------------------------------------------------------------------------------------|
| <b>DNA Viruses</b> |                    |                                  |                                                                                                                                                              |
| Poxviridae         | Chordopoxvirinae   | Orthopoxvirus                    | Vaccinia virus<br>Smallpox virus (variola)                                                                                                                   |
|                    |                    | Parapoxvirus                     | Orf virus (contagious pustular dermatitis)<br>Pseudocowpox virus (milker's nodule)                                                                           |
|                    |                    | Yatapoxvirus<br>Molluscipoxvirus | Yaba- and tanapox viruses<br>Molluscum contagiosum virus                                                                                                     |
| Herpesviridae      | Alphaherpesvirinae | Simplexvirus                     | Human herpesvirus 1<br>(Herpes simplex virus type 1)<br>Human herpesvirus 2<br>(Herpes simplex virus type 2)                                                 |
|                    |                    | Varicellovirus                   | Human herpesvirus 3<br>(Varicella-zoster virus)                                                                                                              |
|                    |                    | Betaherpesvirinae                | Cytomegalovirus                                                                                                                                              |
|                    | Roseolovirus       |                                  | Human herpesvirus 6<br>(human B lymphotropic virus)<br>Human herpesvirus 7                                                                                   |
|                    | Gammaherpesvirinae | Lymphocryptovirus                | Human herpesvirus 4<br>(Epstein-Barr virus)                                                                                                                  |
| Hepadnaviridae     |                    |                                  | Orthohepadnavirus                                                                                                                                            |
| Adenoviridae       |                    | Mastadenovirus                   | Adenoviruses (49)                                                                                                                                            |
| Papovaviridae      |                    | Papillomavirus                   | Papillomaviruses (70)                                                                                                                                        |
|                    |                    | Polyomavirus                     | BK virus (Polyomavirus hominis 1)<br>JC virus (Polyomavirus hominis 2)                                                                                       |
| Parvoviridae       |                    | Parvovirus                       | Human parvovirus B19 (erythema infectiosum or fifth disease) and RA-1 virus                                                                                  |
| <b>RNA Viruses</b> |                    |                                  |                                                                                                                                                              |
| Reoviridae         |                    | Orthoreovirus                    | Reoviruses (3)                                                                                                                                               |
|                    |                    | Coltivirus                       | Colorado tick fever virus                                                                                                                                    |
|                    |                    | Orbivirus                        | Kemerovo virus                                                                                                                                               |
|                    |                    | Rotavirus                        | Human rotaviruses (>6)                                                                                                                                       |
| Togaviridae        |                    | Alphavirus                       | Western, Eastern, and Venezuelan equine encephalitis viruses, Sindbis and Semliki Forest viruses (group A arboviruses, mosquito-borne) (~26)                 |
|                    |                    | Rubivirus                        | Rubella virus                                                                                                                                                |
| Flaviviridae       |                    | Flavivirus                       | St. Louis, Japanese B, and Murray Valley encephalitis viruses; yellow fever, dengue, and West Nile fever viruses (group B arboviruses, mosquito-borne) (~26) |

Correspondence: Dr. Marjorie J. Miller, UCLA Clinical Laboratories, 11633 San Vicente Boulevard, Fourth Floor, Los Angeles, California 90049.

*Clinical Infectious Diseases* 1995;21:279-80  
This article is in the public domain.

| Family                            | Subfamily       | Genus               | Representative species pathogenic for humans<br>(no. of members)                                                                                                                                             |
|-----------------------------------|-----------------|---------------------|--------------------------------------------------------------------------------------------------------------------------------------------------------------------------------------------------------------|
| <b>RNA Viruses</b><br>(Continued) |                 |                     | Kyasanur Forest disease, Omsk hemorrhagic fever,<br>European and Far Eastern tick-borne encephalitis<br>viruses (tick-borne) (~12)<br>Vector-unassociated viruses (~17)                                      |
|                                   |                 | Hepacavirus         | Hepatitis C virus (parenterally transmitted non-A,<br>non-B hepatitis)                                                                                                                                       |
| Coronaviridae                     |                 | Coronavirus         | Human coronaviruses (2)                                                                                                                                                                                      |
| Paramyxoviridae                   | Paramyxovirinae | Paramyxovirus       | Parainfluenza viruses (4)<br>Mumps virus                                                                                                                                                                     |
|                                   | Pneumovirinae   | Morbillivirus       | Measles virus                                                                                                                                                                                                |
|                                   |                 | Pneumovirus         | Respiratory syncytial virus                                                                                                                                                                                  |
| Filoviridae                       |                 | Filovirus           | Marburg and Ebola viruses                                                                                                                                                                                    |
| Rhabdoviridae                     |                 | Vesiculovirus       | Vesicular stomatitis virus                                                                                                                                                                                   |
|                                   |                 | Lyssavirus          | Rabies virus                                                                                                                                                                                                 |
| Orthomyxoviridae                  |                 | Influenzavirus      | Influenza virus types A (many) and B (several)                                                                                                                                                               |
|                                   |                 | Influenza C virus   | Influenza virus type C                                                                                                                                                                                       |
| Bunyaviridae                      |                 | Bunyavirus          | Bunyamwera virus (Bunyamwera serogroup),<br>California encephalitis and LaCrosse viruses<br>(California serogroup), viruses of other serogroups<br>(mosquito-transmitted) (>145)                             |
|                                   |                 | Phlebovirus         | Sandfly fever viruses, Rift Valley fever virus<br>(sandfly-borne primarily) (>30); Uukuniemi and<br>other viruses (tick-transmitted) (~12)                                                                   |
|                                   |                 | Nairovirus          | Crimean-Congo hemorrhagic fever virus, viruses of<br>five other serogroups (tick-transmitted) (>33)                                                                                                          |
|                                   |                 | Hantavirus          | Hantaan virus (Korean hemorrhagic fever or<br>hemorrhagic fever with renal syndrome), Muerto<br>Canyon virus (Four Corners virus, Hantavirus<br>pulmonary syndrome), and others (rodent-<br>associated) (~9) |
| Arenaviridae                      |                 | Arenavirus          | Lymphocytic choriomeningitis virus<br>Lassa fever virus<br>Junin (Argentine hemorrhagic fever virus)<br>Machupo (Bolivian hemorrhagic fever virus)                                                           |
| Retroviridae                      |                 | HTLV-BLV<br>viruses | Human T-lymphotropic viruses I and II                                                                                                                                                                        |
|                                   |                 | Lentivirus          | Human immunodeficiency viruses 1 and 2                                                                                                                                                                       |
| Caliciviridae                     |                 | Calicivirus         | Norwalk and Norwalk-like gastroenteritis viruses<br>(>5)                                                                                                                                                     |
|                                   |                 | Hepevirus           | Hepatitis E virus (enterically transmitted non-A, non-<br>B hepatitis)                                                                                                                                       |
| Picornaviridae                    |                 | Enterovirus         | Polioviruses (3)<br>Coxsackie A viruses (23)<br>Coxsackie B viruses (6)<br>Echoviruses (32)<br>Enteroviruses 68-71 (4)                                                                                       |
|                                   |                 | Hepatovirus         | Hepatitis A virus (enterovirus 72)                                                                                                                                                                           |
|                                   |                 | Rhinovirus          | Common cold viruses (>115)                                                                                                                                                                                   |
